# Supplementary material for: Partners in Postmortem Interval Estimation: X-ray Diffraction and Fourier Transform Spectroscopy
Source: MDPI journal article supplement (doi:10.3390/ijms24076793), 2023-04-05
Supplement: s1 [file s1]

## Supplementary Material

# Partners in Postmortem Interval Estimation: X-ray Diffraction and Fourier Transform Spectroscopy

Leticia Rubio <sup>1,2,3,4,\*</sup>, Juan Suárez <sup>1,2,3,4</sup>, Stella Martin-de-las-Heras <sup>2,3,\*</sup> and Sara C. Zapico <sup>4,5</sup>

<sup>1</sup> Fulbright Visiting Scholar Program. Department of Chemistry and Environmental Sciences, New Jersey Institute of Technology, Tiernan Hall 365, Newark, NJ 07102, USA; juan.suarez@uma.es

<sup>2</sup> Departamento de Anatomía Humana, Medicina Legal e Historia de la Ciencia, Facultad de Medicina, Universidad de Málaga, 29071 Málaga, Spain

<sup>3</sup> Instituto de Investigación Biomédica de Málaga-IBIMA, 29590 Málaga, Spain

<sup>4</sup> Department of Chemistry and Environmental Sciences, New Jersey Institute of Technology, Tiernan Hall 365, Newark, NJ 07102, USA; sc338@njit.edu

<sup>5</sup> Department of Anthropology, NMNH-MRC 112, Smithsonian Institution, Washington, DC 20560, USA

\* Correspondence: lorubio@uma.es (L.R.); smdelasheras@uma.es (S.M.-d.-l.-H.)

**Table S1.** Correlation matrix among crystallographic indexes and compositional parameters in human teeth.

| Variables        | Age                   | Crystallinity         | Crystal size          | M/M ratio                 | C/P ratio                  | Mineral maturity | Collagen maturity |
|------------------|-----------------------|-----------------------|-----------------------|---------------------------|----------------------------|------------------|-------------------|
| PMI              | 0.407<br><b>0.009</b> | 0.500<br><b>0.001</b> | 0.363<br><b>0.021</b> | 0.732<br><b>&lt;0.001</b> | -0.328<br><b>0.039</b>     | -0.190<br>ns     | -0.194<br>ns      |
| Crystallinity    |                       |                       | 0.360<br><b>0.022</b> | 0.426<br><b>0.006</b>     | -0.505<br><b>0.001</b>     | 0.117<br>ns      | -0.159<br>ns      |
| Crystal size     |                       |                       |                       | 0.257<br>ns               | -0.236<br>ns               | 0.112<br>ns      | -0.076<br>ns      |
| M/M ratio        |                       |                       |                       |                           | -0.654<br><b>&lt;0.001</b> | -0.099<br>ns     | -0.145<br>ns      |
| C/P ratio        |                       |                       |                       |                           |                            | 0.040<br>ns      | -0.033<br>ns      |
| Mineral maturity |                       |                       |                       |                           |                            |                  | 0.232<br>ns       |

|                   |
|-------------------|
| Collagen maturity |
|-------------------|

Correlation matrix showing correlation coefficients between a single variable and every other variable. *p*-values are also shown (significance in bold).

**Table S2.** Correlation matrix among crystallographic indexes and compositional parameters in human male teeth.

| Variables         | Age                   | Crystallinity | Crystal size | M/M ratio             | C/P ratio              | Mineral maturity       | Collagen maturity |
|-------------------|-----------------------|---------------|--------------|-----------------------|------------------------|------------------------|-------------------|
| PMI               | 0.615<br><b>0.004</b> | 0.382<br>ns   | 0.241<br>ns  | 0.641<br><b>0.002</b> | -0.020<br>ns           | -0.324<br>ns           | -0.401<br>ns      |
| Crystallinity     |                       |               | 0.362<br>ns  | 0.189<br>ns           | -0.333<br>ns           | -0.016<br>ns           | -0.373<br>ns      |
| Crystal size      |                       |               |              | 0.049<br>ns           | -0.021<br>ns           | 0.401<br>ns            | -0.030<br>ns      |
| M/M ratio         |                       |               |              |                       | -0.492<br><b>0.028</b> | -0.449<br><b>0.047</b> | -0.295<br>ns      |
| C/P ratio         |                       |               |              |                       |                        | 0.257<br>ns            | -0.020<br>ns      |
| Mineral maturity  |                       |               |              |                       |                        |                        | 0.277<br>ns       |
| Collagen maturity |                       |               |              |                       |                        |                        |                   |

Correlation matrix showing correlation coefficients between a single variable and every other variable. *p*-values are also shown (significance in bold).

**Table S3.** Correlation matrix among crystallographic indexes and compositional parameters in human female teeth.

| Variables        | Age         | Crystallinity         | Crystal size          | M/M ratio                 | C/P ratio                  | Mineral maturity | Collagen maturity |
|------------------|-------------|-----------------------|-----------------------|---------------------------|----------------------------|------------------|-------------------|
| PMI              | 0.302<br>ns | 0.601<br><b>0.005</b> | 0.475<br><b>0.034</b> | 0.837<br><b>&lt;0.001</b> | -0.763<br><b>&lt;0.001</b> | -0.093<br>ns     | -0.029<br>ns      |
| Crystallinity    |             |                       | 0.392<br>ns           | 0.651<br><b>0.002</b>     | -0.757<br><b>&lt;0.001</b> | 0.199<br>ns      | -0.021<br>ns      |
| Crystal size     |             |                       |                       | 0.406<br>ns               | -0.363<br>ns               | -0.018<br>ns     | -0.097<br>ns      |
| M/M ratio        |             |                       |                       |                           | -0.909<br><b>&lt;0.001</b> | 0.186<br>ns      | -0.005<br>ns      |
| C/P ratio        |             |                       |                       |                           |                            | -0.168<br>ns     | -0.091<br>ns      |
| Mineral maturity |             |                       |                       |                           |                            |                  | 0.207<br>ns       |

Collagen maturity

Correlation matrix showing correlation coefficients between a single variable and every other variable. *p*-values are also shown (significance in bold).

**Table S4.** Crystallographic indexes and compositional parameters with high loadings in extracted components that contribute towards PMI (0-10-25-50 years) in human teeth.

| Variables         | Component 1<br>(34.1%) | Component 2<br>(19.8%) | Component 3<br>(16.7%) |
|-------------------|------------------------|------------------------|------------------------|
| M/M ratio         | 0.875                  | -                      | -                      |
| C/P ratio         | -0.789                 | -                      | -                      |
| Age               | 0.666                  | -0.401                 | -                      |
| Crystallinity     | 0.578                  | 0.557                  | -                      |
| Crystal size      | -                      | 0.840                  | -                      |
| Mineral maturity  | -                      | -                      | 0.797                  |
| Collagen maturity | -                      | -                      | 0.735                  |

Rotated orthogonal (varimax) component matrix from principal component analysis. A factor loading >0.4 was considered high enough for interpretation (shown). Components together explain 70.5% of the variance that contribute towards PMI.  $\chi^2 = 34.64$ ,  $p < 0.001$ .

**Table S5.** Crystallographic indexes and compositional parameters as predictors for PMI in human teeth.

| Variables         | 0-10 PMI |               |          | 0-25 PMI |               |              | 0-50 PMI |               |              |
|-------------------|----------|---------------|----------|----------|---------------|--------------|----------|---------------|--------------|
|                   | B        | Wald $\chi^2$ | <i>p</i> | B        | Wald $\chi^2$ | <i>p</i>     | B        | Wald $\chi^2$ | <i>p</i>     |
| (Intercept)       | 133.908  | 1.393         | 0.238    | -41.077  | 2.840         | 0.092        | -20.919  | 4.077         | <b>0.043</b> |
| Crystallinity     | 0.569    | 2.420         | 0.120    | 0.817    | 3.893         | <b>0.048</b> | 0.457    | 5.735         | 0.017        |
| Crystal size      | 1.403    | 3.191         | 0.074    | -        | -             | -            | -        | -             | -            |
| M/M ratio         | -14.862  | 2.604         | 0.107    | -        | -             | -            | -        | -             | -            |
| C/P ratio         | -811.79  | 2.084         | 0.149    | -        | -             | -            | -        | -             | -            |
| Mineral maturity  | -        | -             | -        | -10.658  | 2.865         | 0.091        | -7.901   | 2.834         | 0.092        |
| Collagen maturity | -        | -             | -        | -        | -             | -            | -        | -             | -            |
| Age               | -        | -             | -        | -        | -             | -            | -        | -             | -            |
| Backward step     | 3        |               |          | 6        |               |              | 6        |               |              |
| Cox & Snell $R^2$ |          | 0.604         |          |          | 0.508         |              |          | 0.445         |              |
| Nagelkerke $R^2$  |          | 0.806         |          |          | 0.677         |              |          | 0.593         |              |
| Sensitivity       |          | 0.9           |          |          | 0.9           |              |          | 0.9           |              |
| 1-Specificity     |          | 0.1           |          |          | 0.2           |              |          | 0.2           |              |

|              |             |             |             |
|--------------|-------------|-------------|-------------|
| 95% CI       | 0.875-1.045 | 0.755-1.044 | 0.803-1.037 |
| AUC          | 0.96        | 0.90        | 0.92        |
| Overall rate | 87%         | 76%         | 80%         |

Logistic regression (backward method). Variables entered on step 1: age, crystallinity, crystal size, mineral-to-matrix (M/M) ratio, carbonate substitution (C/P ratio), mineral maturity and collagen maturity. A stepping method criteria of 0.05 (entry), 0.2 (removal) and 0.5 (cutoff) were considered. *p*-values are also shown (significance in bold).

**Table S6.** Characteristics of the samples.

| SEX    | AGE | TEETH* | PMI (years) |
|--------|-----|--------|-------------|
| Male   | 55  | 28     | 0           |
| Female | 59  | 44     | 0           |
| Male   | 50  | 44     | 0           |
| Male   | 57  | 27     | 0           |
| Female | 77  | 45     | 0           |
| Male   | 60  | 38     | 0           |
| Male   | 50  | 25     | 0           |
| Female | 74  | 44     | 0           |
| Female | 57  | 38     | 0           |
| Female | 80  | 44     | 0           |
| Male   | 51  | 37     | 10          |
| Female | 53  | 28     | 10          |

|        |    |    |    |
|--------|----|----|----|
| Male   | 55 | 28 | 10 |
| Female | 40 | 36 | 10 |
| Male   | 39 | 38 | 10 |
| Female | 53 | 25 | 10 |
| Female | 42 | 44 | 10 |
| Male   | 51 | 14 | 10 |
| Female | 29 | 28 | 10 |
| Male   | 74 | 25 | 10 |
| Male   | 58 | 25 | 25 |
| Female | 59 | 24 | 25 |
| Male   | 60 | 45 | 25 |
| Male   | 62 | 45 | 25 |
| Female | 56 | 45 | 25 |
| Female | 64 | 14 | 25 |
| Male   | 56 | 45 | 25 |
| Male   | 65 | 25 | 25 |
| Female | 63 | 34 | 25 |
| Female | 60 | 44 | 25 |
| Male   | 68 | 17 | 50 |
| Female | 62 | 27 | 50 |
| Female | 82 | 45 | 50 |
| Male   | 68 | 44 | 50 |
| Male   | 73 | 44 | 50 |
| Female | 68 | 44 | 50 |
| Female | 82 | 34 | 50 |
| Male   | 65 | 35 | 50 |
| Male   | 61 | 35 | 50 |
| Female | 62 | 27 | 50 |

\*Teeth are listed according to the FDI nomenclature . PMI: Postmortem Interval
